# Supplementary material
Source: publisher figshare collection journal article supplement (https://springernature.figshare.com/ndownloader/files/7196456)
Supplement: Supplementary file [file 7196456]

*Additional file 3 Model for aggressiveness of treatment during admission to ICU*

---

| <i>Points assigned</i> | <i>Treatment modality</i>                                          |
|------------------------|--------------------------------------------------------------------|
| 1                      | Mechanical ventilation and/or non-mechanical ventilation treatment |
| 1                      | Inotropic and/or vasopressor treatment                             |
| 1                      | Dialysis treatment                                                 |

---

Points assigned for each treatment modality. Example: Mechanical ventilation (1), non-mechanical ventilation (0), and dialysis (1) = total score (2)

Points grouped as 0-2 points: Partial organ support treatment and 3 points: Full organ support treatment.
